# Supplementary material for: Oral cancer cell-derived exosomes modulate natural killer cell activity by regulating the receptors on these cells
Source: PubMed Central journal article supplement — Int J Mol Med. 2020 Sep 24;46(6):2115–25. doi: 10.3892/ijmm.2020.4736 (PMC7595664; doi:10.3892/ijmm.2020.4736), 2020-09-24

Figure S1. Proteomics analysis of OCEXs. (A) Cellular component of the top 10 proteins in OCEXs. (B) Molecular function of the top 10 identified proteins in OCEXs. (C) Biological process of the top 10 identified proteins in OCEXs. (D) The top 10 KEGG pathways of proteins in OCEXs. OCEXs, oral cancer-derived exosomes.

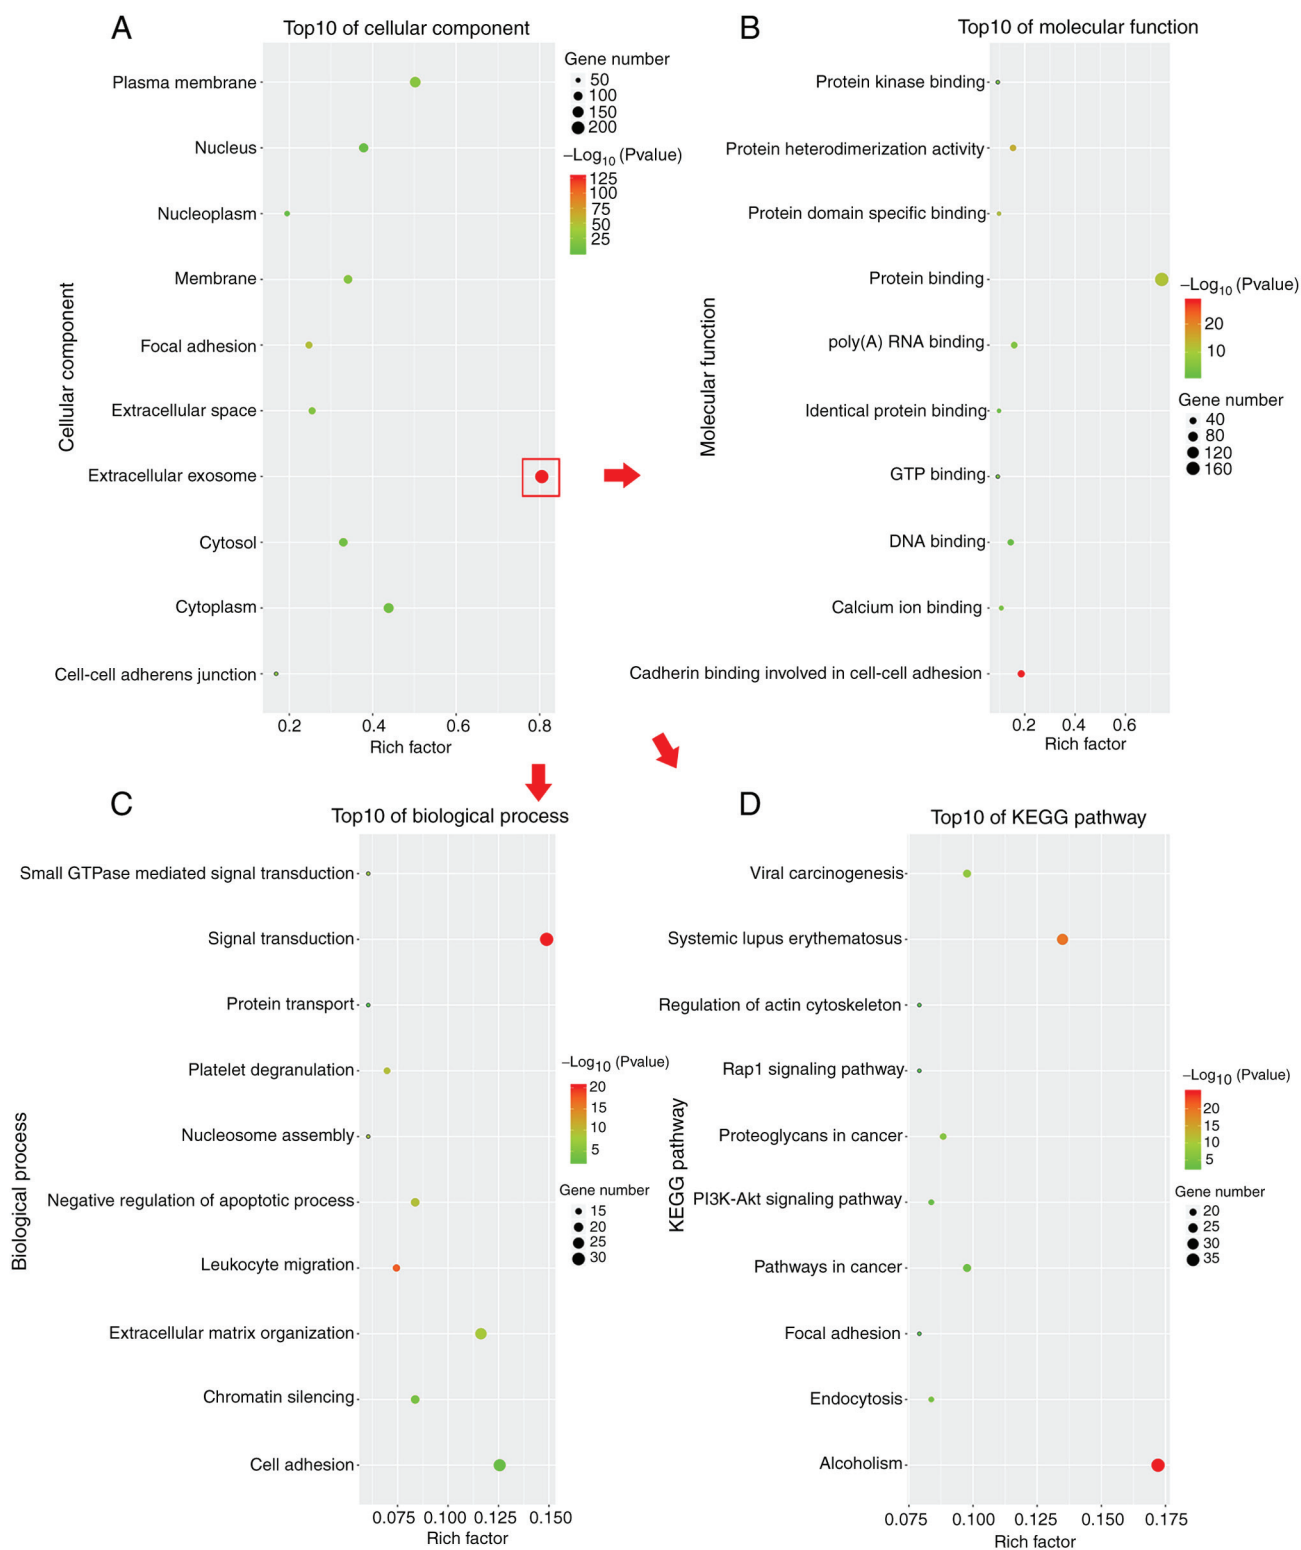

Figure S2. Expression of (A and C) NKp44 and (B and D) NKp46 on NK92MI cells following co-culture with OCEXs or TGF- $\beta$ 1 for 1, 3 and 7 days. Receptors on NK92MI cells were detected by flow cytometry. OCEXs, oral cancer-derived exosomes.

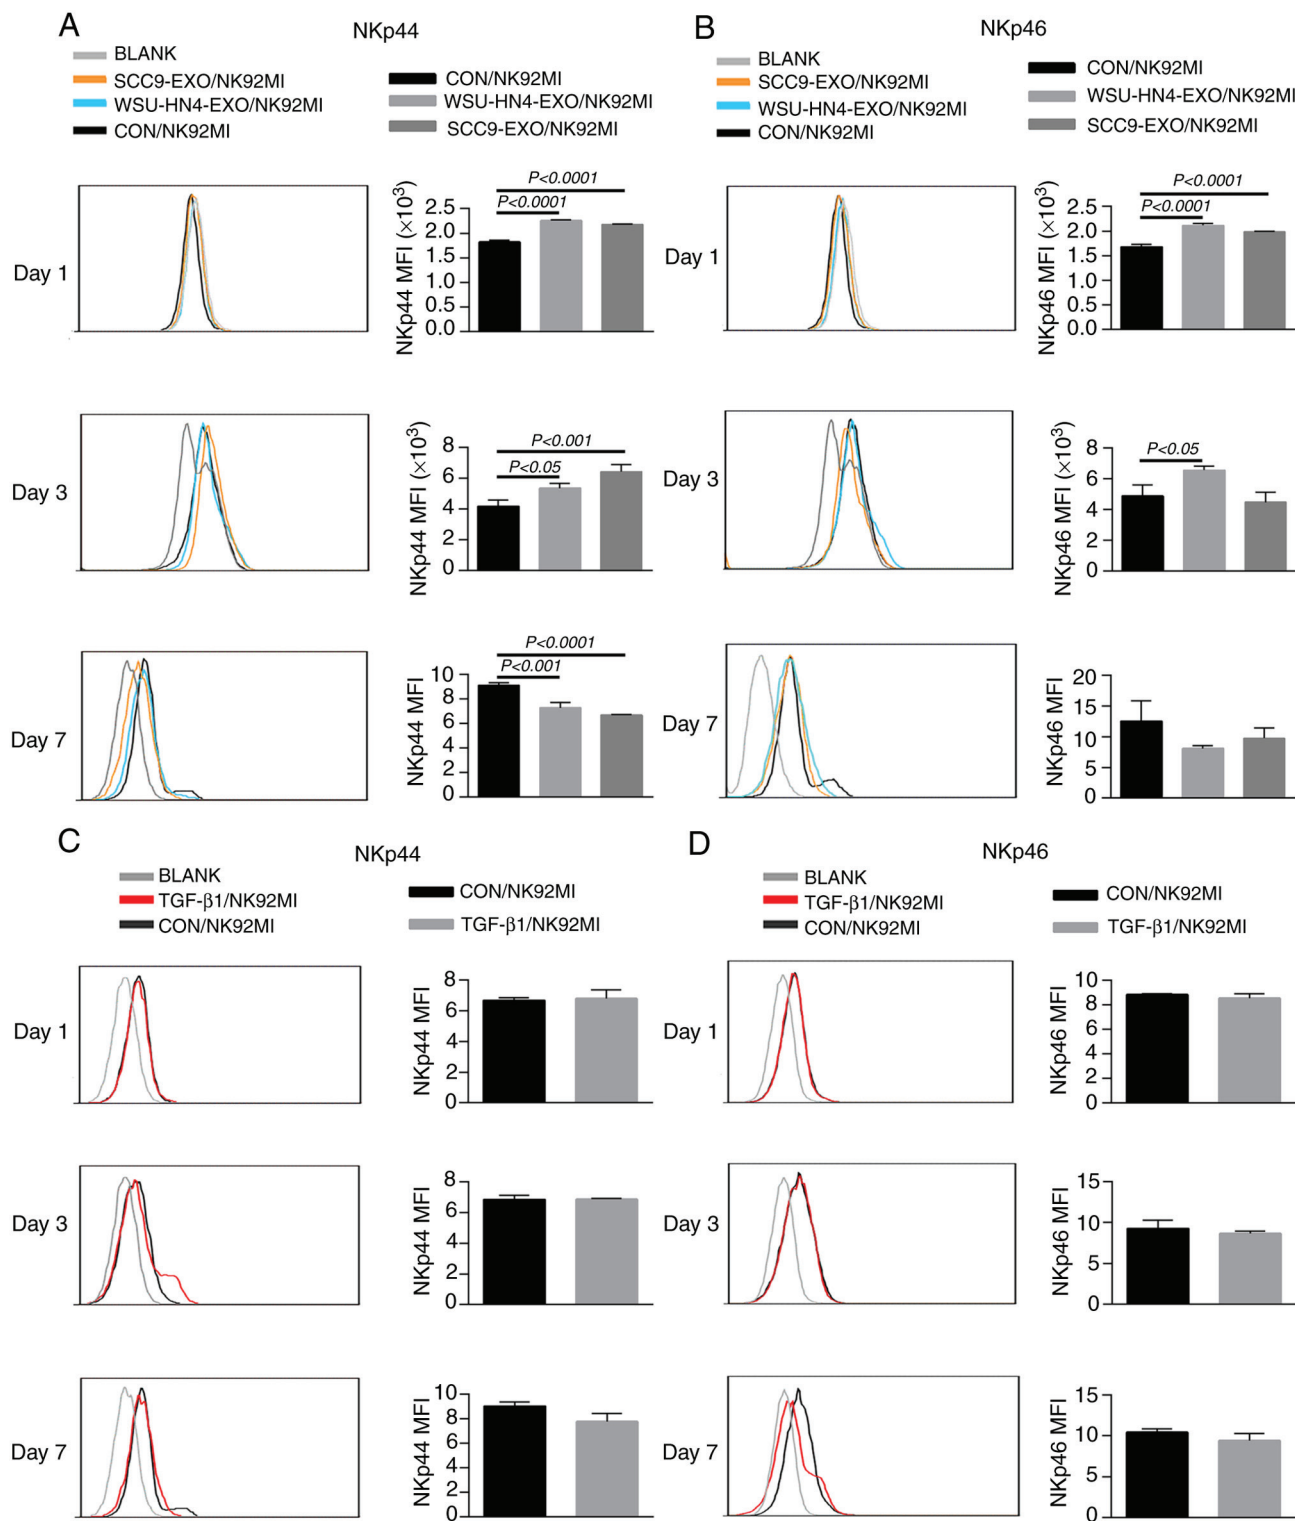

Supplement: Supplementary_Data1.pdf [file Supplementary_Data1.pdf]
